# Supplementary material for: Model based variable selection as a tool to highlight biological differences in Raman spectra of cells
Source: Royal Society of Chemistry journal article supplement (doi:10.1039/c4an00731j), 2014-01-01
Supplement: c4an00731j1.pdf [file c4an00731j1.pdf]

Supplementary material

Figure s1

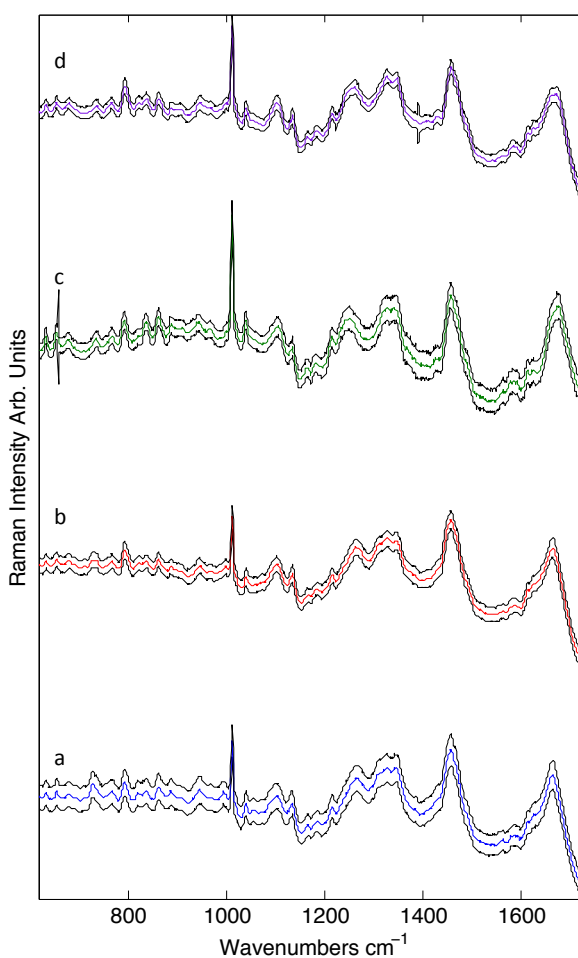

Figure s1: Average spectra and standard deviation of groups of HeLa cells in a) live, b) fixed, c) ethanol dehydrated, and d) rehydrated form. Visual changes can be seen in the Amide I band at  $1655\text{cm}^{-1}$  and the intensity of the Phe band at  $1002\text{cm}^{-1}$ .

Figure s2

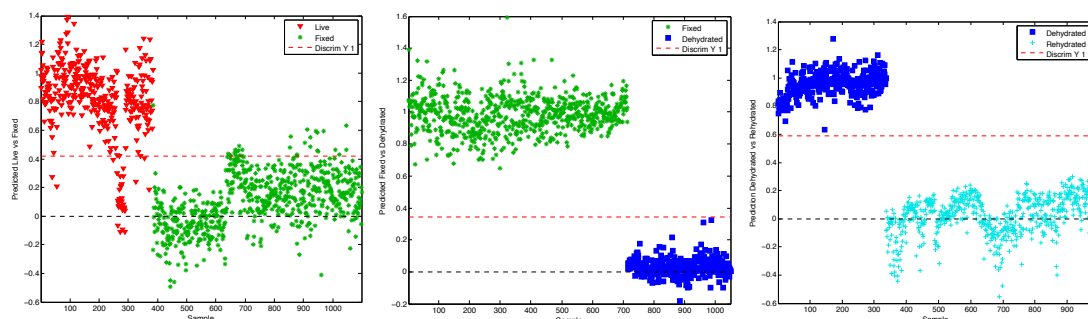

Figure s2: Resulting classification of cross-validated PLS-DA models for Live (red) vs Fixed (green), Fixed (green) vs Ethanol Dehydrated (blue) and Ethanol Dehydrated (blue) vs Rehydrated cells respectively (cyan). For each model the first class should be centered around 1 and the second around 0. For each model the red dotted line indicates the best decision line.
